# Supplementary material for: Effects of Warming and Increased Precipitation on Soil Microbial Residues on the Qinghai–Tibet Alpine Meadows
Source: Copernicus journal article supplement (doi:10.5194/egusphere-2022-1290), 2022-12-14
Supplement: Supplementary file 1 [file egusphere-2022-1290-supplement.pdf]

## Supplement Materials

Structural equation models can not only synthesize existing linear analytical methods but also validate and analyze the relationship among variables while maintaining a strict statistical hypothesis testing method and accommodating measurement errors for the variables. Therefore, structural equations perform general linear analyses, while providing the chance to analyze the structural relationships among variables (hidden variables) that cannot be directly measured. Various nutrient and physical indicators can be directly measured in a soil ecosystem, and the overall soil environment can be evaluated by analyzing them. This is the foundation of a structural equation model. These models are divided into measurement and structural models. The former can measure the relationships among hidden and explicit variables as follows:

$$\bar{X} = \Lambda x \xi + \delta \quad (1)$$

$$\bar{Y} = \Lambda y \eta + \varepsilon, \quad (2)$$

where  $\bar{X}$  is an exogenous explicit variable vector;  $\bar{Y}$  is an endogenous explicit variable vector,  $x$  and  $y$  are factor loadings of index variables ( $\bar{X}, \bar{Y}$ );  $\delta$  and  $\varepsilon$  are the measurement errors of the exogenous and endogenous dominant variables, respectively;  $\xi$  is the exogenous latent variable; and  $\eta$  is the endogenous latent variable. The structural model reflects the relationship among latent variables as follows:

$$\eta = \mathbf{B}\eta + \mathbf{\Gamma}\xi + \xi, \quad (3)$$

where  $\mathbf{B}$  is the structural coefficient matrix of the relationship between endogenous latent variables,  $\mathbf{\Gamma}$  is the matrix of the relationship between endogenous latent and exogenous latent variables, and  $\xi$  is the interference factor in the structural model or the residual value. A path diagram can be established according to this model and maximum likelihood methods.

## Supplement Tables

**Table S1 Significance of two-way analysis of variance in the vertical direction**

| Variation | <i>F</i>      | <i>P</i>         |
|-----------|---------------|------------------|
| ST        | <b>3.751</b>  | <b>0.026</b>     |
| SM        | <b>6.192</b>  | <b>0.003</b>     |
| UGB       | 0.819         | 0.443            |
| BG        | <b>36.92</b>  | <b>&lt;0.001</b> |
| AP        | <b>3.246</b>  | <b>0.042</b>     |
| S-LAP     | <b>20.06</b>  | <b>&lt;0.001</b> |
| CBH       | 0.592         | 0.555            |
| S-NAG     | <b>16.263</b> | <b>&lt;0.001</b> |
| XYL       | <b>3.23</b>   | <b>0.042</b>     |
| TC        | 1.641         | 0.197            |
| TN        | 2.744         | 0.068            |
| TP        | 0.25          | 0.779            |
| SOM       | <b>3.945</b>  | <b>0.022</b>     |
| TAS       | 1.629         | 0.200            |
| GlcN      | <b>4.884</b>  | <b>0.009</b>     |
| GlcN      | 0.025         | 0.976            |
| MurA      | 2.178         | 0.117            |

**Table S2 Significance of two-way analysis of variance in the horizontal direction**

| Variation | Precipitation |                  | Warming       |                  | Precipitation & Warming |                  |
|-----------|---------------|------------------|---------------|------------------|-------------------------|------------------|
|           | <i>F</i>      | <i>P</i>         | <i>F</i>      | <i>P</i>         | <i>F</i>                | <i>P</i>         |
| ST        | 0.037         | 0.849            | <b>16.317</b> | <b>&lt;0.001</b> | <b>8.992</b>            | <b>0.004</b>     |
| SM        | <b>39.797</b> | <b>&lt;0.001</b> | 0.347         | 0.558            | <b>19.651</b>           | <b>&lt;0.001</b> |
| AGB       | <b>36.382</b> | <b>&lt;0.001</b> | <b>7.341</b>  | <b>0.008</b>     | <b>6.325</b>            | <b>0.014</b>     |
| UGB       | <b>27.121</b> | <b>&lt;0.001</b> | 0.925         | 0.339            | 2.396                   | 0.126            |
| BG        | <b>5.334</b>  | <b>0.024</b>     | 0.717         | 0.400            | 2.024                   | 0.159            |
| AP        | <b>5.253</b>  | <b>0.025</b>     | 0.446         | 0.506            | 0.539                   | 0.465            |
| S-LAP     | <b>9.937</b>  | <b>0.002</b>     | 0.691         | 0.409            | 0.216                   | 0.643            |
| CBH       | <b>21.828</b> | <b>&lt;0.001</b> | <b>7.188</b>  | <b>0.009</b>     | <b>20.755</b>           | <b>&lt;0.001</b> |
| S-NAG     | 0.284         | 0.596            | 0.257         | 0.614            | 0.764                   | 0.385            |
| XYL       | <b>19.781</b> | <b>&lt;0.001</b> | 0.564         | 0.455            | <b>11.337</b>           | <b>0.001</b>     |
| TC        | <b>5.729</b>  | <b>0.004</b>     | <b>4.032</b>  | <b>0.047</b>     | 1.323                   | 0.271            |
| TN        | <b>8.193</b>  | <b>0.006</b>     | 3.786         | 0.056            | 0.249                   | 0.619            |
| TP        | 3.202         | 0.078            | 2.983         | 0.089            | <b>9.073</b>            | <b>0.004</b>     |
| SOM       | <b>10.56</b>  | <b>0.002</b>     | <b>8.233</b>  | <b>0.005</b>     | 1.545                   | 0.218            |
| TAS       | <b>22.678</b> | <b>&lt;0.001</b> | 1.711         | 0.195            | 3.593                   | 0.062            |
| GlcN      | <b>34.629</b> | <b>&lt;0.001</b> | 1.769         | 0.188            | <b>15.743</b>           | <b>&lt;0.001</b> |
| GlcN      | 3.516         | 0.065            | 0.411         | 0.523            | 0.581                   | 0.449            |
| MurA      | <b>19.333</b> | <b>&lt;0.001</b> | <b>7.908</b>  | <b>0.006</b>     | 1.935                   | 0.169            |

**Table S3 Significance of two-way analysis of variance in the horizontal direction**

| Abbreviation | Full name                                             |
|--------------|-------------------------------------------------------|
| ACP          | Acid Phosphatase                                      |
| AGFI         | Adjusted Goodness of Fit Index                        |
| AGB          | Aboveground Biomass                                   |
| BG           | $\beta$ -Glucosidase                                  |
| CB           | $\beta$ -D-cellobiosidase                             |
| CFI          | Comparative Fit Index                                 |
| CMIN/DF      | Chi-square Degree of Freedom Ratio                    |
| Dep          | Different Depth                                       |
| GalN         | Galactosamine                                         |
| GFI          | Goodness of Fit Index                                 |
| GluN         | Glucosamine                                           |
| LAP          | Leucine Aminopeptidase                                |
| MurA         | Muramic Acid                                          |
| NAG          | $\beta$ -N-acetylglucosaminidase                      |
| P            | Soil Sampling Point Increased Precipitation Treatment |
| RMSEA        | Root Mean Square Error of Approximation               |
| SOM          | Soil Organic Matter                                   |
| SM           | Soil Moisture                                         |
| ST           | Soil Temperature                                      |
| TAS          | Total Amino Sugar                                     |
| TC           | Total Carbon                                          |
| TN           | Total Nitrogen                                        |
| TP           | Total Phosphorus                                      |
| UGB          | Underground biomass                                   |
| W            | Soil Sampling Point Warming Treatment                 |
| XYL          | $\beta$ -xylosidase                                   |

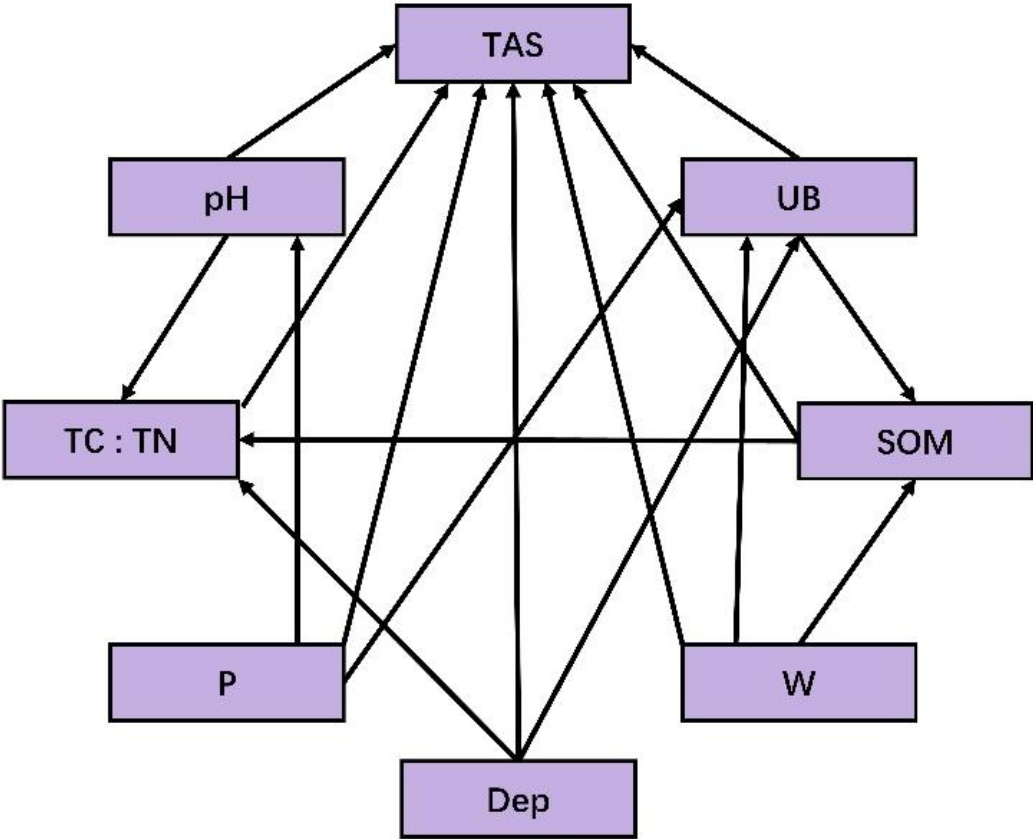

555 **Figure S1:** A priori model of physicochemical properties controlling amino sugar turnover in the soil in different scenarios. Boxes represent variables. Single arrows indicate causality. (The residuals are not plotted)

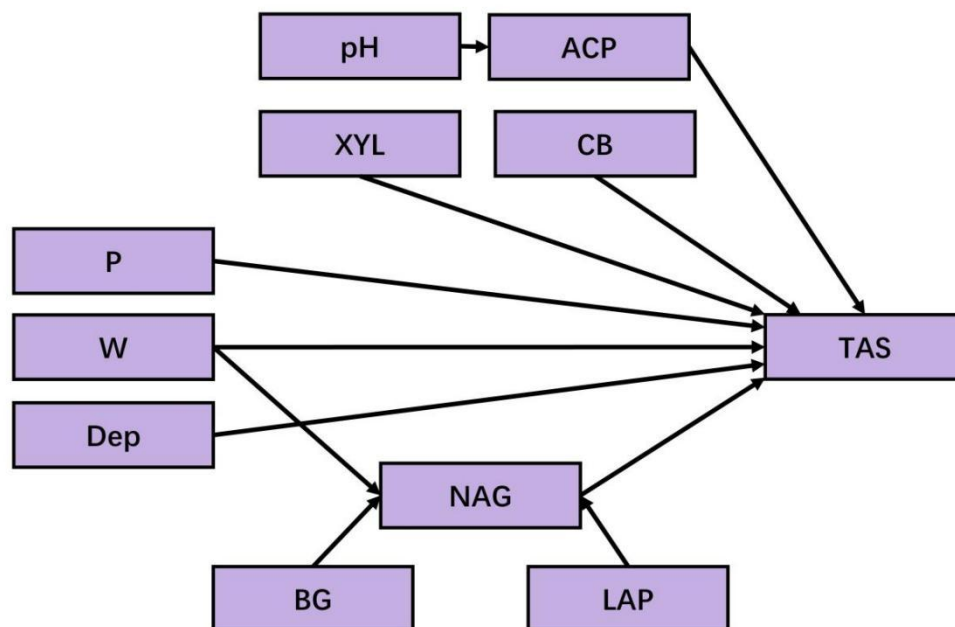

560 **Figure S2:** A priori model for controlling amino sugar turnover in soil by soil extracellular enzyme activities in different scenarios. Boxes represent variables. Single arrows indicate causality. (The residuals are not plotted)

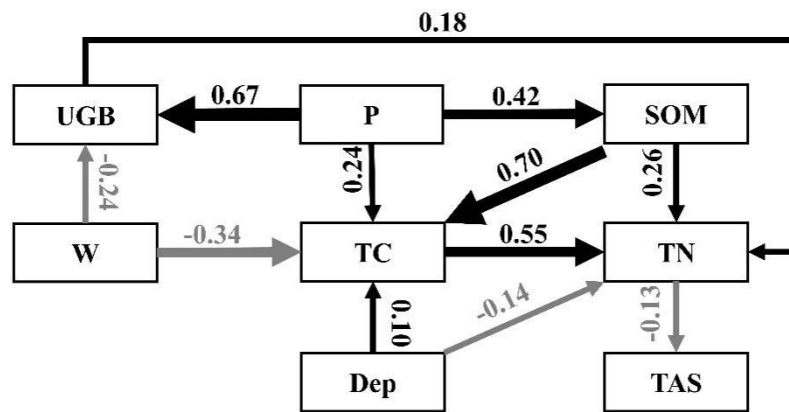

**Figure S3:** Structural equation model of total amino sugars turnover rate and soil physicochemical properties in different scenarios. An arrow represents a causal relationship ( $p < 0.1$ ). Arrow direction indicates the direction of effect. Arrow width indicates effect size. A black arrow denotes a positive relationship, and a grey arrow a negative relationship. Numbers beside arrows are standardized path coefficients. CMIN/DF = 0.780, CFI = 1.000, GFI = 0.924, AGFI = 0.830, RMSEA = 0.000, PCLOSE = 0.780.

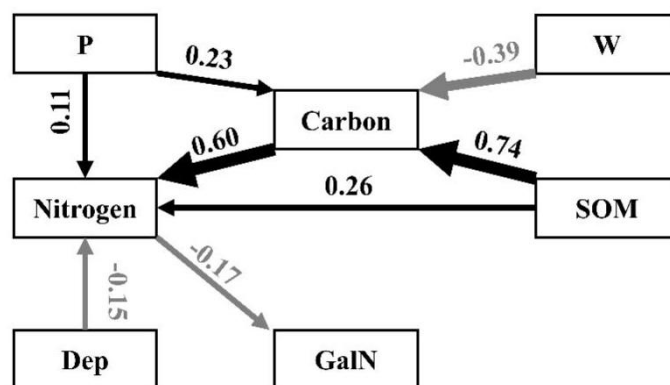

570 **Figure S4:** Structural equation model of the turnover rate of GalN and soil physicochemical properties in different scenarios. An arrow represents a causal relationship ( $p < 0.1$ ). Arrow direction indicates the direction of effect. Arrow width indicates effect size. A black arrow denotes a positive relationship, and a grey arrow a negative relationship. Numbers beside arrows are standardized path coefficients. CMIN/DF = 0.100, CFI = 1.000, GFI = 0.917, AGFI = 0.806, RMSEA = 0.006, PCLOSE = 0.526.



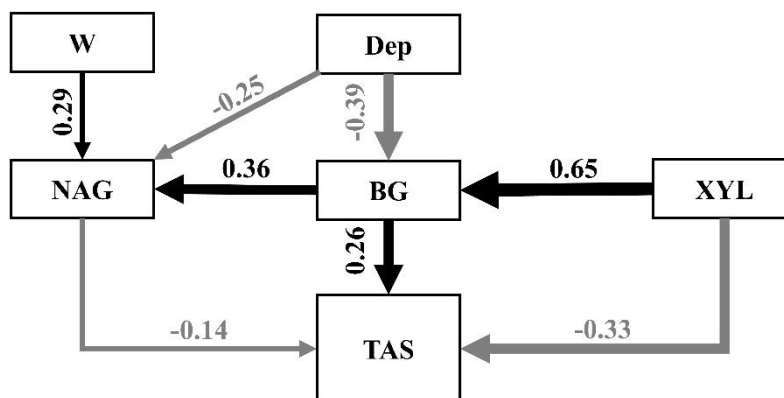

575

**Figure S5:** Structural equation model of total amino sugar turnover rate and soil extracellular enzyme activities in different scenarios. An arrow represents a causal relationship ( $p < 0.1$ ). Arrow direction indicates the direction of effect. Arrow width indicates effect size. A black arrow denotes a positive relationship, and a grey arrow a negative relationship. Numbers beside arrows are standardized path coefficients. CMIN/DF = 0.469, CFI = 1.000, GFI = 0.971, AGFI = 0.913, RMSEA = 0.000, PCLOSE = 0.884.

580

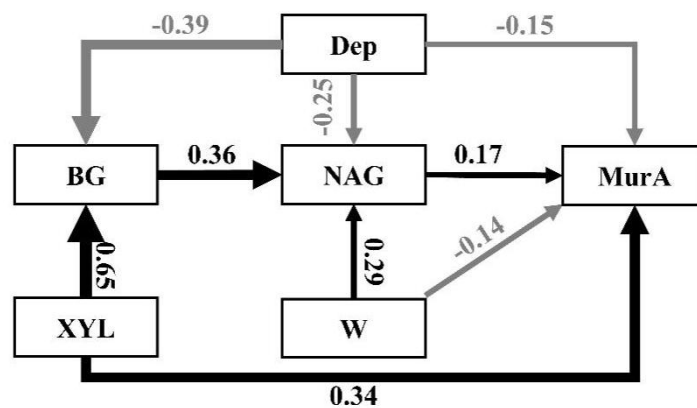

**Figure S6:** Structural equation model of MurA turnover rate and soil extracellular enzyme activities in different scenarios. An arrow represents a causal relationship ( $p < 0.1$ ). Arrow direction indicates the direction of effect. Arrow width indicates effect size. A black arrow denotes a positive relationship, and a grey arrow a negative relationship. Numbers beside arrows are standardized path coefficients.

CMIN/DF = 0.412, CFI = 1.000, GFI = 0.977, AGFI = 0.920, RMSEA = 0.000, PCLOSE = 0.893.
